# Supplementary material for: Potential for a novel manganese porphyrin compound as adjuvant canine lymphoma therapy
Source: Springer Nature journal article supplement (doi:10.1007/s00280-017-3372-z), 2017-07-06

### Correlation Machine vs. Manual Pulse

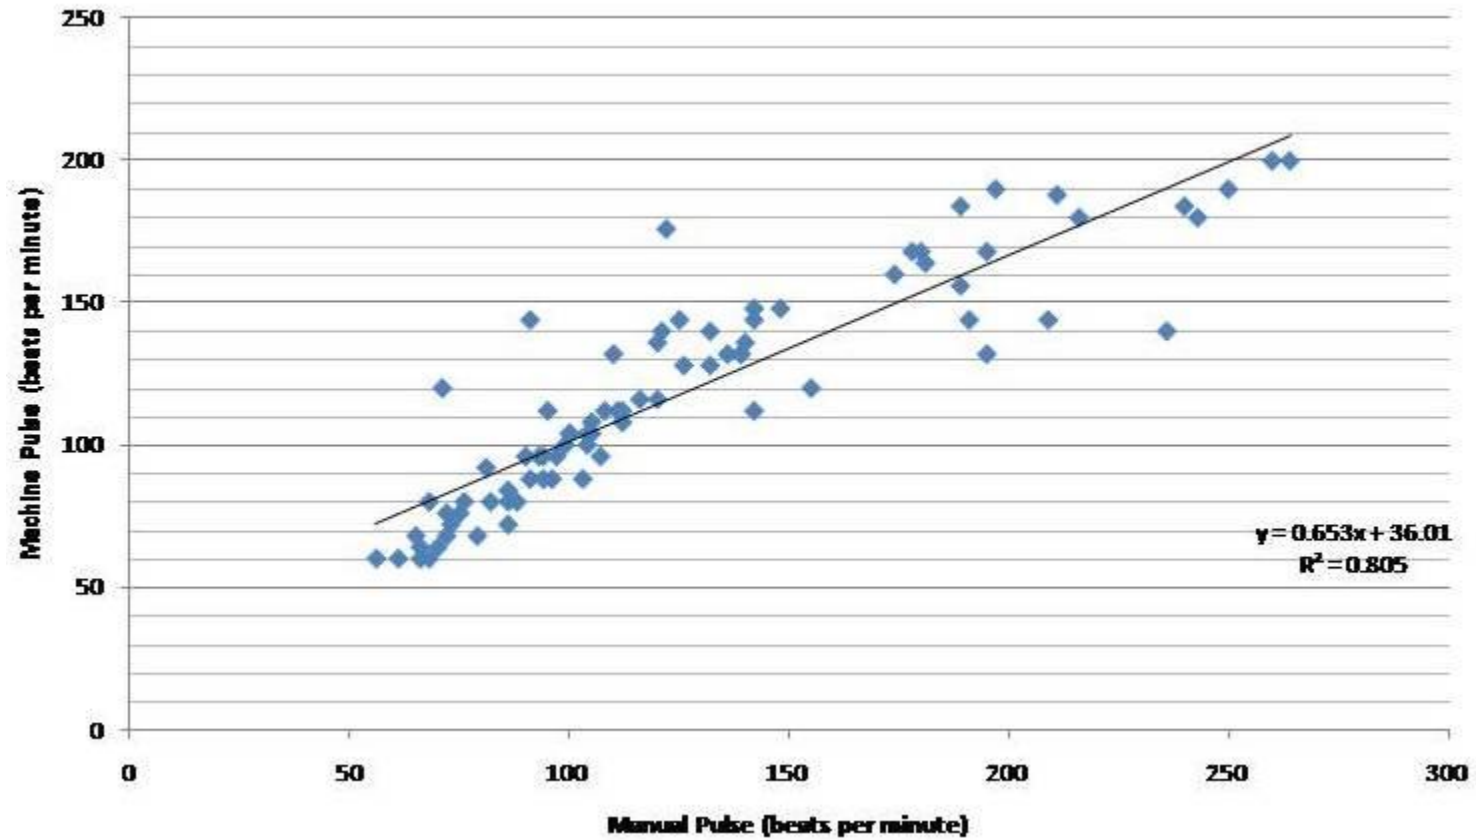

**Indirect Blood Pressure, 1mg/kg**

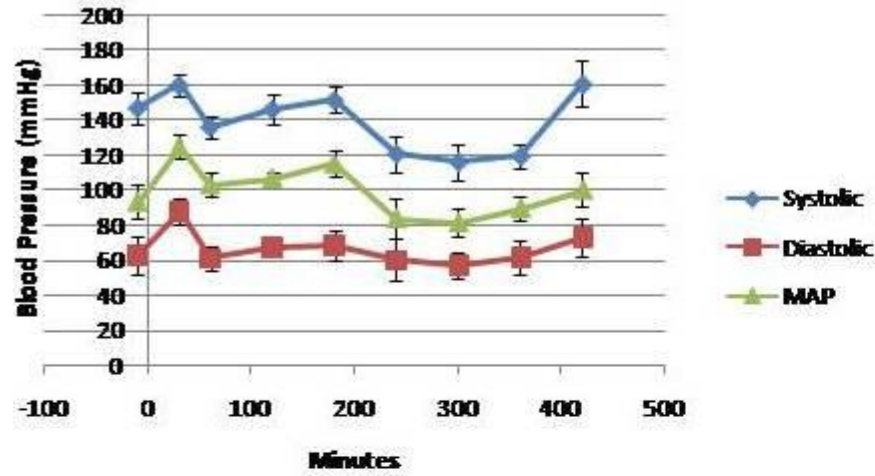

**Indirect Blood Pressure, 0.5mg/kg**

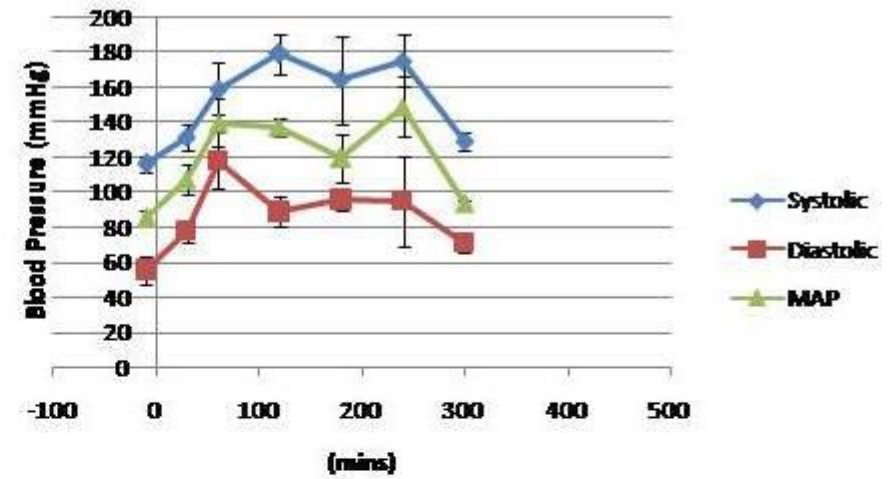

**Indirect Blood Pressure, 0.25mg/kg**

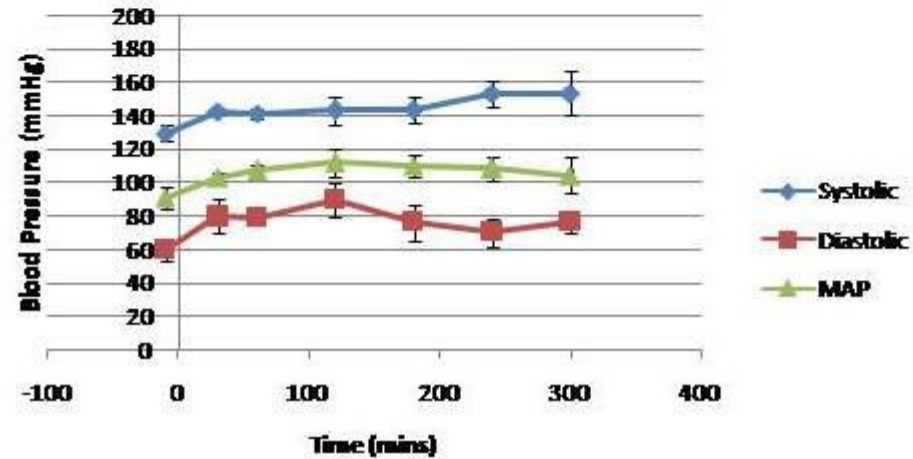

**Blood Pressure and Pulse**  
**Dog 2, 1mg/kg**

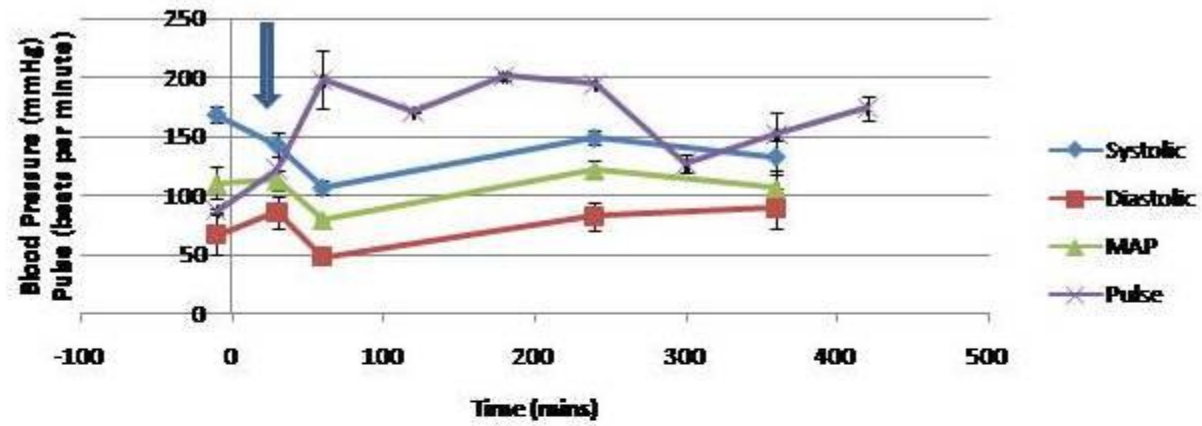

**Blood Pressure and Pulse**  
**Dog 3, 1mg/kg**

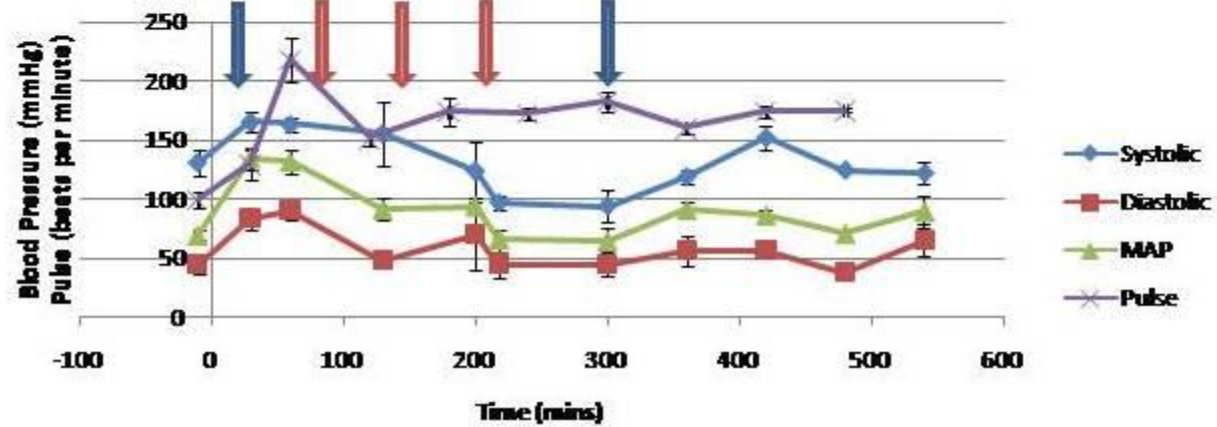

Supplement: MOESM1 [file 13278832]
